# Supplementary material for: Aberrant methylation of GADD45A is associated with decreased radiosensitivity in cervical cancer through the PI3K/AKT signaling pathway
Source: PubMed Central journal article supplement — Oncol Lett. 2020 Nov 3;21(1):8. doi: 10.3892/ol.2020.12269 (PMC7681222; doi:10.3892/ol.2020.12269), 2020-11-03

Figure S1. GADD45A promoter methylation status in the 51 remaining patients with CC. GADD45A methylation status in (A) radiosensitive and (B) radioresistant CC samples. R, radioresistant tissues; S, radiosensitive tissues; M, methylated; U, unmethylated.

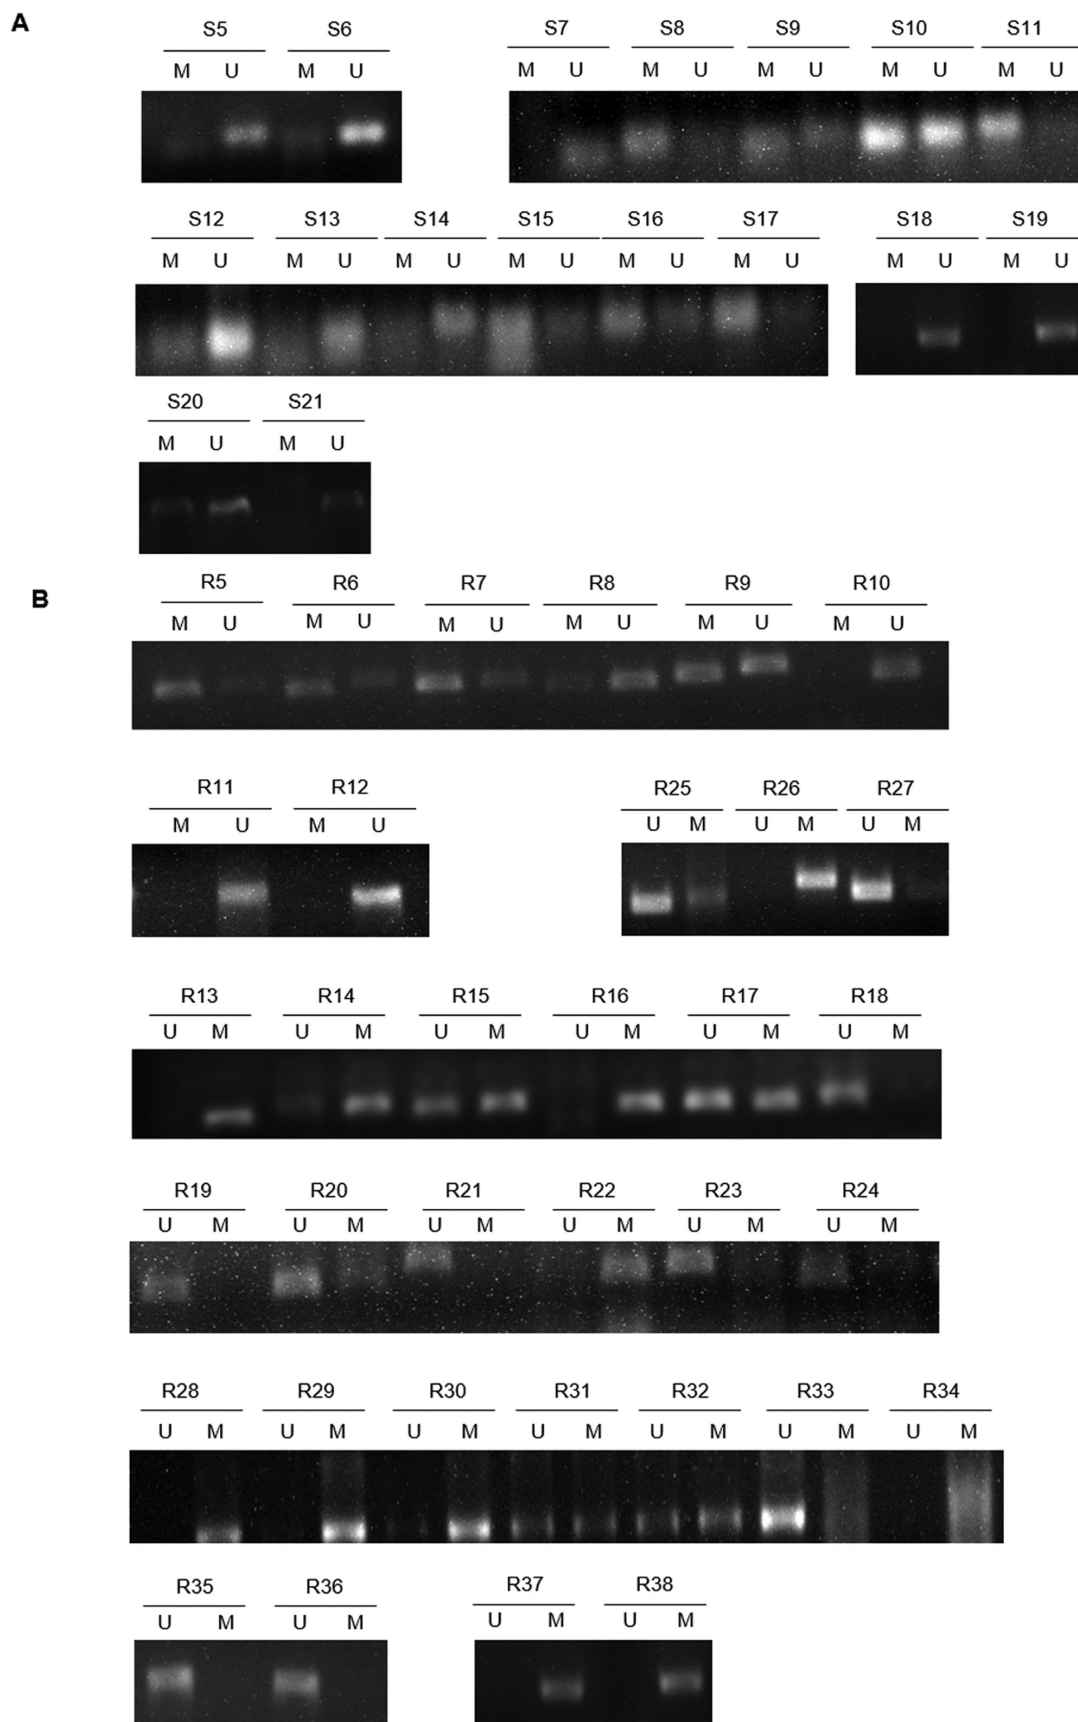

Supplement: Supplementary_Data.pdf [file Supplementary_Data.pdf]
